# Supplementary material for: The Importance of Entomo-Virological Investigation of Yellow Fever Virus to Strength Surveillance in Brazil
Source: Preprints.org preprint supplement (doi:10.20944/preprints202305.0969.v1), 2023-05-15
Supplement: Supplementary file 1 [file supplementary]

## Sheet: Table S1
	Table S1: Description of pools of mosquitoes from 2016.
	Brazilian Region	State	Municipality	SAARB/IEC Registration Number	Species	Mosquitoes per pool	Collection Date	RT-qPCR	Cycle threshold			State	Pools	Total Mosquitoes
	North	Tocantins	Darcinópolis	841308	Ae. (Stg.) aegypti ♀	1	2016-10-13	Negative	-			Tocantins	14	44
				841309	Ae. (Stg.) aegypti ♀	2	2016-10-13	Negative	-			Goiás	35	322
				841310	Ae. (Stg.) aegypti ♂	3	2016-10-13	Negative	-			TOTAL	49	366
			Ananás	841314	Ae. (Stg.) aegypti ♂	1	2016-10-13	Negative	-
				841318	Ae. (Stg.) aegypti ♀	2	11,12/10/2016	Negative	-
				841319	Ae. (Stg.) aegypti ♀	2	2016-10-12	Negative	-
				841320	Ae. (Stg.) aegypti ♂	7	11,12/10/2016	Negative	-
				841327	Ae. (Stg.) aegypti ♀	5	2016-10-11	Negative	-
				841328	Ae. (Stg.) aegypti ♀	3	2016-10-11	Negative	-
				841329	Ae. (Stg.) aegypti ♂	8	2016-10-11	Negative	-
				841333	Ae. (Stg.) aegypti ♀	1	2016-10-11	Negative	-
				841334	Ae. (Stg.) aegypti ♂	6	2016-10-11	Negative	-
				841339	Ae. (Stg.) aegypti ♀	1	2016-10-11	Negative	-
				841340	Ae. (Stg.) aegypti ♂	2	11,12/10/2016	Negative	-
	Midwest	Goiás	Jandaia	831906	Hg. (Hag.) janthinomys	30	2016-02-24	Positive	26.17
				831907	Hg. (Hag.) janthinomys	30	2016-02-24	Positive	23.52
				831908	Hg. (Hag.) janthinomys	28	2016-02-24	Positive	21.26
				831909	Hg. (Hag.) janthinomys	7	2016-02-26	Positive	18.27
				831912	Sa. (Sab.) albiprivus	2	2016-02-24	Negative	-
				831913	Sa. (Sbo.) chloropterus	16	24,26/02/2016	Negative	-
				831914	Sa. (Sbo.) glaucodaemon	30	2016-02-24	Positive	31.27
				831915	Sa. (Sbo.) glaucodaemon	7	2016-02-26	Negative	-
				831916	Ae. (Stg.) aegypti ♀	1	2016-03-09	Negative	-
				831917	Ae. (Och.) fulvus	2	2016-03-09	Negative	-
				831918	Ae. (Och.) scapularis	4	2016-03-09	Negative	-
				831919	Ae. (Och.) serratus	8	2016-03-09	Negative	-
				831937	Sa. (Sbo.) chloropterus	1	2016-03-08	Negative	-
				831938	Sa. (Sbo.) glaucodaemon	2	2016-03-08	Negative	-
				831939	Ae. (Stg.) albopictus ♀	5	22,23/02/2016	Negative	-
				831940	Ae. (Och.) scapularis	4	22,23/02/2016	Negative	-
				831941	Ae. (Pro.) argyrothorax	4	2016-02-22	Negative	-
				831942	Ae. (How.) species	1	2016-02-23	Negative	-
				831945	Hg. (Hag.) leucocelaenus	8	22,23/02/2016	Negative	-
				831946	Hg. (Hag.) janthinomys	24	22,23/02/2016	Negative	-
				831951	Sa. (Sbo.) chloropterus	3	2016-02-23	Negative	-
				831952	Sa. (Sbo.) glaucodaemon	9	22,23/02/2016	Negative	-
				831955	Hg. (Hag.) janthinomys	1	2016-03-10	Negative	-
			Leopoldo de Bolhões	840195	Ae. (Stg.) aegypti ♀	18	2016-09-13	Negative	-
				840196	Ae. (Stg.) aegypti ♀	19	2016-09-13	Negative	-
				840197	Ae. (Stg.) aegypti ♀	18	2016-09-14	Negative	-
				840198	Ae. (Stg.) aegypti ♀	16	15,16/09/2016	Negative	-
				840199	Ae. (Stg.) aegypti ♂	3	13,14/09/2016	Negative	-
				840202	Sa. (Sbo.) glaucodaemon	1	2016-09-15	Negative	-
				840203	Ae. (Stg.) aegypti ♀	2	2016-09-16	Negative	-
				840204	Ae. (Och.) scapularis	1	2016-09-16	Negative	-
			Bonópolis	840209	Sa. (Sab.) albiprivus	1	2016-09-23	Negative	-
				840210	Sa. (Sab.) amazonicus	6	24,25/09/2016	Negative	-
				840211	Sa. (Sbo.) chloropterus	8	23,24,25/09/2016	Negative	-
				840212	Sa. (Sbo.) glaucodaemon	2	23,25/09/2016	Negative	-

## Sheet: Table S2
	Table S2: Description of pools of mosquitoes from 2017.
	Brazilian Region	State	Municipality	SAARB/IEC Registration Number	Species	Mosquitoes per pool	Collection Date	RT-qPCR	Cycle threshold			State	Pools	Total Mosquitoes
	Southeast	Minas Gerais	Ituêta	843690	Ae. (Stg.) albopictus ♀	25	2017-01-14	Positive	23.88			Minas Gerais	93	663
				843691	Ae. (Och.) scapularis	25	2017-01-14	Negative	-			Pará	60	1082
				843692	Ae. (Och.) scapularis	25	2017-01-14	Positive	31.08			Bahia	18	183
				843693	Ae. (Pro.) argyrothorax	2	2017-01-14	Positive	33.79			Goiás	24	607
				843698	Hg. (Hag.) janthinomys	1	2017-01-14	Negative	-			Mato Grosso	2	3
				843702	Ae. (Stg.) albopictus ♀	32	2017-01-14	Negative	-			TOTAL	197	2538
				843703	Ae. (Stg.) albopictus ♂	3	2017-01-14	Negative	-
				843704	Ae. (Och.) species	6	2017-01-14	Negative	-
				843705	Ae. (Och.) scapularis	12	2017-01-14	Negative	-
			Central de Minas	843709	Ae. (Stg.) albopictus ♀	15	2017-01-13	Negative	-
				843710	Ae. (Och.) scapularis	4	2017-01-13	Negative	-
				843712	Hg. (Con.) leucocelaenus	7	2017-01-13	Negative	-
				843713	Hg. (Hag.) janthinomys	15	2017-01-13	Positive	32.23
			Alvarenga	843715	Ae. (Stg.) albopictus ♀	4	2017-01-15	Positive	34.28
				843716	Ae. (Pro.) argyrothorax	2	2017-01-15	Positive	32.88
				843717	Ae. (How.) species	1	2017-01-15	Positive	35.55
				843718	Hg. (Con.) leucocelaenus	13	2017-01-15	Negative	-
				843719	Hg. (Hag.) janthinomys	25	2017-01-15	Negative	-
				843720	Hg. (Hag.) janthinomys	25	2017-01-15	Positive	29.08
				843721	Hg. (Hag.) janthinomys	25	2017-01-15	Positive	28.44
				843722	Hg. (Hag.) janthinomys	11	2017-01-15	Negative	-
				843723	Sa. (Sab.) albiprivus	1	2017-01-15	Negative	-
				843724	Sa. (Pey.) soperi	11	2017-01-15	Negative	-
			São José do Jacuri	843726	Ae. (Stg.) albopictus ♀	3	2017-01-16	Negative	-
				843727	Ae. (Och.) serratus	11	2017-01-16	Negative	-
				843728	Hg. (Hag.) janthinomys	19	2017-01-16	Positive	32.09
				843735	Sa. (Sab.) albiprivus	7	2017-01-16	Negative	-
			São Sebastião do Maranhão	843738	Ae. (Och.) scapularis	3	2017-01-17	Positive	24.08
				843741	Hg. (Con.) leucocelaenus	2	2017-01-17	Positive	24.09
				843742	Hg. (Hag.) janthinomys	9	2017-01-17	Negative	-
				843744	Sa. (Sab.) albiprivus	6	2017-01-17	Negative	-
			Itamarandiba	843745	Ae. (Och.) serratus	1	2017-01-18	Positive	35.46
				843748	Hg. (Hag.) janthinomys	2	2017-01-18	Negative	-
				843749	Sa. (Sab.) albiprivus	1	2017-01-18	Negative	-
				843752	Ae. (Och.) serratus	1	2017-01-18	Negative	-
				843755	Hg. (Con.) leucocelaenus	4	2017-01-18	Negative	-
				843756	Hg. (Hag.) janthinomys	5	2017-01-18	Negative	-
				843759	Ae. (Och.) scapularis	1	2017-01-18	Negative	-
				843760	Hg. (Hag.) janthinomys	2	2017-01-18	Negative	-
			Felício dos Santos	843763	Hg. (Hag.) janthinomys	4	2017-01-18	Negative	-
				843764	Hg. (Con.) leucocelaenus	13	2017-01-20	Negative	-
				843765	Hg. (Hag.) janthinomys	6	2017-01-20	Positive	32.52
				843769	Sa. (Sab.) albiprivus	13	2017-01-20	Negative	-
			Caratinga	843771	Ae. (Stg.) albopictus ♀	2	2017-01-10	Positive	35.12
				843772	Ae. (Och.) serratus	2	2017-01-10	Positive	32.16
				843773	Ae. (Pro.) argyrothorax	1	2017-01-10	Negative	-
				843774	Sa. (Sab.) albiprivus	2	2017-01-10	Negative	-
				843775	Sa. (Sbn.) intermedius	1	2017-01-10	Negative	-
				843776	Ae. (Och.) serratus	13	2017-01-10	Negative	-
				843777	Hg. (Hag.) janthinomys	1	2017-01-10	Positive	27.6
				843780	Sa. (Sab.) albiprivus	4	2017-01-10	Negative	-
				843782	Ae. (Stg.) albopictus ♀	4	2017-01-11	Negative	-
				843783	Ae. (Och.) scapularis	4	2017-01-11	Negative	-
				843784	Ae. (Och.) serratus	20	2017-01-11	Negative	-
				843785	Ae. (Och.) serratus	15	2017-01-11	Negative	-
				843786	Hg. (Hag.) janthinomys	1	2017-01-11	Negative	-
			Piedade da Caratinga	843791	Ae. (Och.) scapularis	4	2017-01-11	Negative	-
				843792	Ae. (Och.) serratus	11	2017-01-11	Negative	-
				843793	Ae. (Stg.) albopictus ♀	4	2017-01-12	Negative	-
				843794	Ae. (Och.) scapularis	4	2017-01-12	Negative	-
				843795	Ae. (Och.) serratus	28	2017-01-12	Negative	-
				843796	Ae. (Pro.) argyrothorax	1	2017-01-12	Negative	-
				843797	Hg. (Hag.) species	1	2017-01-12	Negative	-
			Uraporanga	843801	Ae. (Stg.) albopictus ♀	1	2017-01-14	Negative	-
				843802	Ae. (Och.) serratus	14	2017-01-14	Negative	-
				843803	Hg. (Con.) leucocelaenus	1	2017-01-14	Negative	-
			Imbé de Minas	843806	Ae. (Stg.) albopictus ♀	1	2017-01-16	Negative	-
				843807	Hg. (Hag.) janthinomys	4	2017-01-16	Positive	34.81
				843810	Ae. (Och.) scapularis	1	2017-01-17	Negative	-
				843811	Ae. (Och.) serratus	9	2017-01-17	Negative	-
				843812	Hg. (Con.) leucocelaenus	5	2017-01-17	Negative	-
				843813	Hg. (Hag.) janthinomys	7	2017-01-17	Negative	-
				843817	Hg. (Con.) leucocelaenus	2	2017-01-17	Negative	-
			São Domingos das Dores	843820	Hg. (Hag.) janthinomys	4	2017-01-18	Negative	-
				843821	Ae. (Stg.) albopictus ♀	1	2017-01-19	Positive	35.61
				843822	Ae. (Och.) scapularis	2	2017-01-19	Negative	-
				843823	Hg. (Con.) leucocelaenus	34	2017-01-19	Negative	-
				843824	Hg. (Hag.) janthinomys	18	2017-01-19	Negative	-
				843826	Sa. (Sbn.) intermedius	1	2017-01-19	Negative	-
				843829	Ae. (Stg.) albopictus ♀	4	2017-01-19	Positive	35.18
				843830	Hg. (Con.) leucocelaenus	1	2017-01-19	Negative	-
				843832	Sa. (Sab.) albiprivus	2	2017-01-19	Negative	-
			Januária	844701	Ae. (Stg.) albopictus ♀	1	2017-01-25	Negative	-
				844702	Ae. (Stg.) albopictus ♂	1	2017-01-26	Negative	-
				844703	Hg. (Hag.) janthinomys	2	2017-01-26	Negative	-
				844706	Sa. (Sab.) albiprivus	1	2017-01-26	Negative	-
				844707	Sa. (Sbo.) glaucodaemon	3	26,27/01/2017	Negative	-
				844709	Ae. (Och.) scapularis	2	2017-02-08	Negative	-
				844710	Ae. (Och.) serratus	8	2017-02-08	Negative	-
				844711	Hg. (Hag.) janthinomys	3	2017-02-08	Negative	-
				844715	Sa. (Sab.) albiprivus	1	2017-02-08	Negative	-
				844716	Sa. (Sbo.) glaucodaemon	2	2017-02-08	Negative	-
				844720	Sa. (Sbo.) chloropterus	1	2017-02-09	Negative	-
	North	Pará	Belém	844477	Ae. (Stg.) albopictus ♀	2	25/02;01/03/2017	Negative	-
				844479	Ae. (Och.) species	1	2017-02-27	Negative	-
				844480	Ae. (Och.) fulvus	1	2017-03-01	Negative	-
				844481	Ae. (Och.) scapularis	20	24,25,27,28/02;01/03/2017	Negative	-
				844482	Ae. (Och.) serratus	26	24,25,27,28/02;01/03/2017	Negative	-
				844483	Ae. (Och.) taeniorhynchus	1	2017-02-27	Negative	-
				844512	Hg. (Hag.) janthinomys	21	24,25,27/02/2017	Negative	-
				844524	Hg. (Hag.) janthinomys	28	2017-02-25	Negative	-
				844525	Hg. (Hag.) janthinomys	17	27,28/02;01/03/2017	Negative	-
				844528	Sa. (Sab.) belisarioi	8	2017-02-28	Negative	-
				844529	Sa. (Sab.) quasicyaneus	2	25,28/02/2017	Negative	-
				844530	Sa. (Sbo.) chloropterus	3	25,28/02/2017	Negative	-
				844531	Ae. (Stg.) aegypti ♀	33	2017-02-26	Negative	-
				844532	Ae. (Stg.) aegypti ♂	25	2017-02-26	Negative	-
				844533	Ae. (Stg.) aegypti ♂	15	2017-02-26	Negative	-
				844534	Ae. (Och.) scapularis	2	2017-02-26	Negative	-
				845371	Ae. (Stg.) albopictus ♀	1	2017-03-23	Negative	-
				845372	Ae. (Och.) scapularis	10	22,24,25/03/2017	Negative	-
			Alenquer	846350	Ae. (Och.) hortalor	15	28,29,30,31/03/2017	Negative	-
				846351	Ae. (Och.) fulvus	8	28,29,31/03/2017	Negative	-
				846352	Ae. (Och.) scapularis	30	2017-03-28	Negative	-
				846353	Ae. (Och.) scapularis	23	2017-03-28	Negative	-
				846354	Ae. (Och.) scapularis	14	29, 30,31/03;03/04/2017	Negative	-
				846355	Ae. (Och.) serratus	30	2017-03-28	Negative	-
				846356	Ae. (Och.) serratus	30	2017-03-28	Negative	-
				846357	Ae. (Och.) serratus	30	2017-03-28	Negative	-
				846358	Ae. (Och.) serratus	30	2017-03-28	Negative	-
				846359	Ae. (Och.) serratus	30	2017-03-28	Negative	-
				846360	Ae. (Och.) serratus	30	2017-03-28	Negative	-
				846361	Ae. (Och.) serratus	30	2017-03-28	Negative	-
				846362	Ae. (Och.) serratus	22	2017-03-28	Negative	-
				846363	Ae. (Och.) serratus	30	2017-03-29	Negative	-
				846364	Ae. (Och.) serratus	30	2017-03-29	Negative	-
				846365	Ae. (Och.) serratus	35	2017-03-29	Negative	-
				846366	Ae. (Och.) serratus	30	2017-03-30	Negative	-
				846367	Ae. (Och.) serratus	30	2017-03-30	Negative	-
				846368	Ae. (Och.) serratus	28	2017-03-30	Negative	-
				846369	Ae. (Och.) serratus	30	2017-03-31	Negative	-
				846370	Ae. (Och.) serratus	30	2017-03-31	Negative	-
				846371	Ae. (Och.) serratus	30	2017-03-31	Negative	-
				846372	Ae. (Och.) serratus	30	2017-03-31	Negative	-
				846373	Ae. (Och.) serratus	30	2017-03-31	Negative	-
				846374	Ae. (Och.) serratus	30	2017-03-31	Negative	-
				846375	Ae. (Och.) serratus	30	2017-03-31	Negative	-
				846376	Ae. (Och.) serratus	30	2017-03-31	Negative	-
				846377	Ae. (Och.) serratus	20	2017-03-31	Negative	-
				846378	Ae. (Och.) serratus	20	2017-04-03	Negative	-
				846379	Ae. (Och.) serratus	20	2017-04-03	Negative	-
				846380	Ae. (Och.) oligopistus	1	2017-03-28	Negative	-
				846381	Ae. (How.) species	1	2017-03-31	Negative	-
				846399	Hg. (Hag.) janthinomys	1	2017-03-28	Negative	-
				846534	Ae. (Och.) fulvus	1	2017-03-28	Negative	-
				846535	Ae. (Och.) scapularis	3	2017-03-28	Negative	-
				846536	Ae. (Och.) serratus	6	28,29,30/03/2017	Negative	-
				846539	Hg. (Hag.) janthinomys	20	28,29,30,31/03/2017	Negative	-
				846540	Hg. (Hag.) janthinomys	14	2017-04-03	Negative	-
				846602	Sa. (Sab.) species	2	28,29/03/2017	Negative	-
				846603	Sa. (Sab.) belisarioi	1	2017-03-29	Negative	-
				846604	Sa. (Sab.) tarsopus	1	2017-04-03	Negative	-
				846605	Sa. (Sbo.) chloropterus	10	28,29,31/03/2017	Negative	-
	Northeast	Bahia	Alagoinhas	845779	Ae. (Och.) scapularis	3	22,23/03/2017	Negative	-
				845784	Sa. (Sab.) albiprivus	1	2017-03-23	Negative	-
			Côcos	845786	Ae. (Stg.) albopictus ♀	12	15,16,21/03/2017	Negative	-
				845787	Ae. (Och.) scapularis	17	15,16,21/03/2017	Negative	-
				845788	Ae. (Och.) serratus	1	2017-03-21	Negative	-
				845789	Ae. (Pro.) terrens	1	2017-03-16	Negative	-
				845790	Ae. (How.) species	2	15,16/03/2017	Negative	-
				845791	Hg. (Hag.) janthinomys	30	15,16/03/2017	Negative	-
				845792	Hg. (Hag.) spegazzinii	7	15,16/03/2017	Negative	-
				845796	Sa. (Sab.) albiprivus	11	15,16/03/2017	Negative	-
				845797	Sa. (Sbo.) chloropterus	4	15,16/03/2017	Negative	-
				845799	Ae. (Stg.) albopictus ♀	13	17,18/03/2017	Negative	-
				845800	Ae. (Och.) scapularis	12	17,20/03/2017	Negative	-
				845801	Ae. (Och.) serratus	8	17,18,20/03/2017	Negative	-
				845803	Hg. (Hag.) janthinomys	18	17,18,20/03/2017	Positive	28.63
				845804	Hg. (Hag.) spegazzinii	35	17,18,20/03/2017	Negative	-
				845814	Sa. (Sab.) albiprivus	7	17,18,20/03/2017	Negative	-
				845815	Sa. (Sbo.) chloropterus	1	2017-03-18	Negative	-
	Midwest	Goiás	Goiânia	846770	Ae. (Stg.) aegypti ♀	27	10,11/04/2017	Negative	-
				846771	Ae. (Stg.) aegypti ♀	20	2017-04-12	Negative	-
				846772	Ae. (Stg.) aegypti ♂	14	10,11,12/04/2017	Negative	-
				846773	Ae. (Och.) scapularis	30	2017-04-10	Negative	-
				846774	Ae. (Och.) scapularis	30	2017-04-10	Negative	-
				846775	Ae. (Och.) scapularis	30	2017-04-10	Negative	-
				846776	Ae. (Och.) scapularis	30	2017-04-10	Negative	-
				846777	Ae. (Och.) scapularis	30	2017-04-10	Negative	-
				846778	Ae. (Och.) scapularis	25	2017-04-10	Negative	-
				846779	Ae. (Och.) scapularis	30	2017-04-11	Negative	-
				846780	Ae. (Och.) scapularis	30	2017-04-11	Negative	-
				846781	Ae. (Och.) scapularis	30	2017-04-11	Negative	-
				846782	Ae. (Och.) scapularis	30	2017-04-11	Negative	-
				846783	Ae. (Och.) scapularis	30	2017-04-11	Negative	-
				846784	Ae. (Och.) scapularis	17	2017-04-11	Negative	-
				846785	Ae. (Och.) scapularis	30	2017-04-12	Negative	-
				846786	Ae. (Och.) scapularis	30	2017-04-12	Negative	-
				846787	Ae. (Och.) scapularis	30	2017-04-12	Negative	-
				846788	Ae. (Och.) scapularis	30	2017-04-12	Negative	-
				846789	Ae. (Och.) scapularis	30	2017-04-12	Negative	-
				846790	Ae. (Och.) scapularis	20	2017-04-12	Negative	-
				846791	Ae. (Och.) serratus	1	2017-04-11	Negative	-
				846792	Ae. (How.) species	4	10,12/04/2017	Negative	-
				846795	Hg. (Con.) leucocelaenus	29	10,11,12/04/2017	Negative	-
		Mato Grosso	São José do Povo	847075	Ae. (Stg.) albopictus ♀	1	2017-04-27	Negative	-
				847076	Ae. (Och.) scapularis	2	2017-04-27	Negative	-

## Sheet: Table S3
	Table S3: Sequences used in the phylogenetic analysis.
	GenBank accession number	Host	Country	Year	YFV genotype
	MK822618	Callithrix sp.	Brazil: Rio de Janeiro	2018	South America I
	MK822619	Callithrix sp.	Brazil: Rio de Janeiro	2018
	MK822604	Homo sapiens	Brazil: Espírito Santo	2017
	MK333808	Haemagogus janthinomys	Brazil: Minas Gerais	2018
	MF423377	Alouatta clamitans	Brazil: Rio de Janeiro	2017
	MF538785	Callithrix sp.	Brazil: Rio de Janeiro	2017
	MF423373	Haemagogus leucocelaenus	Brazil: Espírito Santo	2017
	MF423378	Alouatta clamitans	Brazil: Rio de Janeiro	2017
	MF538784	Homo sapiens	Brazil: Rio de Janeiro	2017
	MF370530	Haemagogus janthinomys	Brazil: Minas Gerais: Alvarenga	2017
	MH329655	Aedes albopictus	Brazil: Minas Gerais: Ituêta	2017
	MF423374	Haemagogus janthinomys	Brazil: Espírito Santo	2017
	KY885000	Alouatta clamitans	Brazil	2017
	KY885001	Alouatta clamitans	Brazil	2017
	MK822621	Callithrix sp.	Brazil: Rio de Janeiro	2018
	MK822600	Lentopithecus rosalia	Brazil: Rio de Janeiro	2018
	MK822607	Allouata sp.	Brazil: Rio de Janeiro	2017
	MK822611	Callithrix sp.	Brazil: Espírito Santo	2017
	MF423376	Alouatta clamitans	Brazil: Rio de Janeiro	2017
	MF538783	Homo sapiens	Brazil: Rio de Janeiro	2017
	MF434851	Homo sapiens	Brazil: Rio de Janeiro	2017
	MG550109	Homo sapiens	Brazil: Rio de Janeiro	2017
	MF423375	Alouatta clamitans	Brazil: Rio de Janeiro	2017
	MF538786	Callithrix sp.	Brazil: Rio de Janeiro	2017
	MF538782	Homo sapiens	Brazil: Rio de Janeiro	2017
	MK882601	Homo sapiens	Brazil: Espírito Santo	2017
	OQ932915	Haemagogus janthinomys	Brazil: Goiás: Jandaia	2016
	OQ932914	Haemagogus janthinomys	Brazil: Goiás: Jandaia	2016
	OQ932916	Haemagogus janthinomys	Brazil: Goiás: Jandaia	2016
	MK333804	Sapajus libidinosus	Brazil: Goiás	2015
	KM388815	Alouatta seniculus	Venezuela	2007
	KM388818	Alouatta seniculus	Venezuela	2006
	KM388814	Homo sapiens	Venezuela	2005
	KM388816	Alouatta seniculus	Venezuela	2010
	KM388817	Alouatta seniculus	Venezuela	2004
	KY861728	Alouatta sp.	Brazil: Rio Grande do Sul	2008
	JF912190	Homo sapiens	Brazil: Roraima	2002
	JF912187	Homo sapiens	Brazil: Goiás	2000
	JF912188	Homo sapiens	Brazil: Goiás	2000
	JF912189	Haemagogus leucocelaenus	Brazil: Rio Grande do Sul	2001
	HM582851	Alouatta seniculus	Trinidad and Tobago	2009
	JF912182	Homo sapiens	Brazil: Pará	1984
	JF912185	Sabethes sp.	Brazil: Mato Grosso do Sul	1992
	JF912179	Haemagogus sp.	Brazil: Goiás	1980
	JF912184	Homo sapiens	Brazil: Pará	1987
	JF912186	Homo sapiens	Brazil: Minas Gerais	1994
	JF912183	Homo sapiens	Brazil: Pará	1984
	JF912180	Homo sapiens	Brazil: Pará	1981
	JF912181	Homo sapiens	Brazil	1983	South America II
	KF907504	Homo sapiens	Bolivia	1999
	JX898874	Aedes taylori	Senegal	2000	West Africa II
	JX898875	Aedes furcifer	Senegal	2000
	JX898873	Aedes furcifer	Senegal	2000
	AY572535	Homo sapiens	Gambia	2001
	JX898868	Homo sapiens	Senegal	1995
	JX898870	Aedes furcifer	Senegal	1996
	AY603338	Homo sapiens	Côte d'Ivoire	1999
	KU978765	Homo sapiens	Guinea Bissau	1965
	JX898877	Aedes furcifer	Senegal	2005
	JX898880	Aedes luteocephalus	Senegal	2005
	JX898878	Aedes furcifer	Senegal	2005
	JX898876	Aedes furcifer	Senegal	2001
	AY640589	Homo sapiens	Ghana	1927
	KF769016	Homo sapiens	Ghana	1927
	KU978764	Homo sapiens	Sudan	1941
	MF289572	Homo sapiens	Singapore	2017
	JX898871	Aedes aegypti	Senegal	1995
	JX898872	Aedes aegypti	Senegal	1995
	AF094612	Haemagogus spegazzini	Trinidad and Tobago	1979
	KU978763	Homo sapiens	Nigeria	1946	West Africa I
	U547981	Homo sapiens	Côte d'Ivoire	1982
	JX898869	Aedes africanus	Côte d'Ivoire	1973
	KU949599	Homo sapiens	China	2016	Angola
	KX982182	Homo sapiens	Angola	2016
	KX010996	Homo sapiens	China	2016
	KY587416	Homo sapiens	China	2016
	KY873607	Homo sapiens	China	2016
	KX010995	Homo sapiens	China	2016
	KX027336	Homo sapiens	China	2016
	KX268355	Homo sapiens	China	2016
	KY495641	Homo sapiens	China	2016
	KU921608	Homo sapiens	China	2016
	KX010994	Homo sapiens	China	2016
	AY968064	Homo sapiens	Angola	1971
	DQ235229	Homo sapiens	Ethiopia	1961	East/Central Africa
	JN620362	Homo sapiens	Uganda	2010
	AY968065	Homo sapiens	Uganda	1948	East Africa
